# Supplementary material for: Bilberry (Vaccinium myrtillus L.) Powder Has Anticarcinogenic Effects on Oral Carcinoma In Vitro and In Vivo
Source: MDPI journal article supplement (doi:10.3390/antiox10081319), 2021-08-22
Supplement: s1 [file s1]

**Supplementary Table S1.** Average amount of AC content ( $\pm$  SD; mg/100 g; dry weight) of the bilberry powder used at the assays. Dp, Delphinidin; Cy, Cyanidin; Pt, Petunidin; Pn, Peonidin; Pl, Pelargonidin; Mv, Malvidin.

| Compounds                  | mg/100g           |
|----------------------------|-------------------|
| <b>Dp 3-glc</b>            | 134.14 $\pm$ 3.10 |
| <b>Cy 3 glc</b>            | 226.01 $\pm$ 2.74 |
| <b>Pt 3-glc</b>            | 192.23 $\pm$ 4.52 |
| <b>Pn 3-glc</b>            | 149.69 $\pm$ 3.84 |
| <b>Pl 3-glc</b>            | 2.44 $\pm$ 0.28   |
| <b>Mv 3-glc</b>            | 132.17 $\pm$ 5.11 |
| <b>Pn p-coumaryl 3-glu</b> | 0.57 $\pm$ 0.09   |
| <b>Mv p-coumaryl 3-glu</b> | 0.00              |
| <b>Dp-3-arab</b>           | 97.26 $\pm$ 3.17  |
| <b>Cy 3-arab</b>           | 109.48 $\pm$ 2.31 |
| <b>Pt-3-arab</b>           | 37.72 $\pm$ 1.13  |
| <b>Pn 3-arab</b>           | 18.43 $\pm$ 0.43  |
| <b>Mv-3-arab</b>           | 39.21 $\pm$ 1.12  |
| <b>Cy-3-rut</b>            | 6.96 $\pm$ 3.73   |
| <b>Dp 3-gal</b>            | 56.01 $\pm$ 0.9   |
| <b>Cy 3-gal</b>            | 31.56 $\pm$ 15.83 |
| <b>Pt 3-gal</b>            | 60.37 $\pm$ 1.95  |
| <b>Pn 3-gal</b>            | 78.28 $\pm$ 3.07  |
| <b>Mv 3-gal</b>            | 62.26 $\pm$ 1.61  |
| <b>Pl 3-gal</b>            | 0.81 $\pm$ 0.05   |
| <b>Cy 3-samb</b>           | 9.76 $\pm$ 0.39   |
| <b>Cy-3,5-diglucoside</b>  | 0.81 $\pm$ 0.05   |
| <b>Pn-3,5-diglucoside</b>  | 0.4 $\pm$ 0.06    |

**Supplementary Table S2.** The effects of wild blueberry powder (0, 0,2, 1, 5, 10 and 25 mg/ml) on the viability of HSC-3, IHGKs and HMKs after 24h and 72h incubations.

|                  |           | N  | Mean | Std. Dev. | T-test (Sig) |
|------------------|-----------|----|------|-----------|--------------|
| <b>HSC-3 24h</b> | Control   | 12 | 0,03 | 0,01      |              |
|                  | 0,2 mg/ml | 12 | 0,02 | 0,00      | <b>0,04</b>  |
|                  | 1 mg/ml   | 12 | 0,02 | 0,01      | <b>0,04</b>  |
|                  | 5 mg/ml   | 12 | 0,01 | 0,01      | <b>0,003</b> |
|                  | 10 mg/ml  | 12 | 0,01 | 0,01      | <b>0,000</b> |
|                  | 25 mg/ml  | 12 | 0,00 | 0,01      | <b>0,000</b> |
| <b>HSC-3 72h</b> | Control   | 12 | 0,12 | 0,03      |              |
|                  | 0,2 mg/ml | 12 | 0,09 | 0,02      | <b>0,02</b>  |
|                  | 1 mg/ml   | 12 | 0,06 | 0,05      | <b>0,002</b> |
|                  | 5 mg/ml   | 12 | 0,05 | 0,03      | <b>0,000</b> |
|                  | 10 mg/ml  | 12 | 0,02 | 0,01      | <b>0,000</b> |
|                  | 25 mg/ml  | 12 | 0,00 | 0,00      | <b>0,000</b> |
| <b>IHGK 24h</b>  | Control   | 18 | 0,02 | 0,02      |              |
|                  | 0,2 mg/ml | 18 | 0,02 | 0,02      | 0,640        |
|                  | 1 mg/ml   | 18 | 0,03 | 0,02      | 0,406        |
|                  | 5 mg/ml   | 17 | 0,03 | 0,02      | 0,186        |
|                  | 10 mg/ml  | 17 | 0,04 | 0,03      | 0,065        |
|                  | 25 mg/ml  | 17 | 0,02 | 0,01      | 0,885        |
| <b>IHGK 72h</b>  | Control   | 18 | 0,05 | 0,02      |              |
|                  | 0,2 mg/ml | 18 | 0,07 | 0,02      | <b>0,005</b> |
|                  | 1 mg/ml   | 18 | 0,07 | 0,02      | <b>0,003</b> |
|                  | 5 mg/ml   | 17 | 0,05 | 0,02      | 0,558        |

|                |           |    |      |      |              |
|----------------|-----------|----|------|------|--------------|
|                | 10 mg/ml  | 17 | 0,02 | 0,01 | <b>0,000</b> |
|                | 25 mg/ml  | 17 | 0,02 | 0,01 | <b>0,000</b> |
| <b>HMK 24h</b> | Control   | 12 | 0,01 | 0,01 |              |
|                | 0,2 mg/ml | 12 | 0,01 | 0,01 | 0,820        |
|                | 1 mg/ml   | 12 | 0,01 | 0,01 | 0,707        |
|                | 5 mg/ml   | 12 | 0,01 | 0,01 | 0,442        |
|                | 10 mg/ml  | 12 | 0,01 | 0,01 | 0,280        |
|                | 25 mg/ml  | 12 | 0,01 | 0,01 | 0,104        |
| <b>HMK 72h</b> | Control   | 18 | 0,10 | 0,04 |              |
|                | 0,2 mg/ml | 18 | 0,10 | 0,05 | 0,960        |
|                | 1 mg/ml   | 18 | 0,09 | 0,04 | 0,712        |
|                | 5 mg/ml   | 18 | 0,10 | 0,04 | 0,771        |
|                | 10 mg/ml  | 18 | 0,05 | 0,03 | <b>0,000</b> |
|                | 25 mg/ml  | 18 | 0,02 | 0,01 | <b>0,000</b> |

**Supplementary Table S3.** The effects of wild blueberry powder (0, 0,2, 1, 5, 10 and 25 mg/ml) on the proliferation of HSC-3, IHGKs and HMKs after 24h and 72h incubations.

|                  |           | N  | Mean | Std. Dev. | T-test (Sig) |
|------------------|-----------|----|------|-----------|--------------|
| <b>HSC-3 24h</b> | Control   | 12 | 0,80 | 0,08      |              |
|                  | 0,2 mg/ml | 12 | 1,08 | 0,26      | <b>0,01</b>  |
|                  | 1 mg/ml   | 11 | 0,90 | 0,27      | 0,35         |
|                  | 5 mg/ml   | 12 | 0,72 | 0,29      | 0,49         |
|                  | 10 mg/ml  | 12 | 0,41 | 0,24      | <b>0,00</b>  |
|                  | 25 mg/ml  | 8  | 0,00 | 0,00      | <b>0,00</b>  |
| <b>HSC-3 72h</b> | Control   | 12 | 0,57 | 0,28      |              |
|                  | 0,2 mg/ml | 11 | 0,61 | 0,36      | 0,76         |
|                  | 1 mg/ml   | 11 | 0,84 | 0,66      | 0,29         |
|                  | 5 mg/ml   | 12 | 0,80 | 0,53      | 0,27         |
|                  | 10 mg/ml  | 12 | 0,24 | 0,23      | <b>0,01</b>  |
|                  | 25 mg/ml  | 12 | 0,00 | 0,01      | <b>0,00</b>  |
| <b>IHGK 24h</b>  | Control   | 18 | 0,16 | 0,07      |              |
|                  | 0,2 mg/ml | 18 | 0,18 | 0,08      | 0,544        |
|                  | 1 mg/ml   | 18 | 0,17 | 0,07      | 0,874        |
|                  | 5 mg/ml   | 18 | 0,16 | 0,08      | 0,923        |
|                  | 10 mg/ml  | 18 | 0,14 | 0,05      | 0,220        |
|                  | 25 mg/ml  | 18 | 0,05 | 0,05      | <b>0,000</b> |
| <b>IHKG 72h</b>  | Control   | 18 | 0,87 | 0,56      |              |
|                  | 0,2 mg/ml | 18 | 0,96 | 0,68      | 0,687        |
|                  | 1 mg/ml   | 18 | 0,88 | 0,58      | 0,951        |
|                  | 5 mg/ml   | 18 | 0,56 | 0,46      | 0,075        |
|                  | 10 mg/ml  | 18 | 0,28 | 0,25      | <b>0,000</b> |

|                |           |    |      |      |              |
|----------------|-----------|----|------|------|--------------|
|                | 25 mg/ml  | 18 | 0,11 | 0,04 | <b>0,000</b> |
| <b>HMK 24h</b> | Control   | 18 | 0,33 | 0,11 |              |
|                | 0,2 mg/ml | 18 | 0,29 | 0,07 | 0,216        |
|                | 1 mg/ml   | 18 | 0,34 | 0,16 | 0,865        |
|                | 5 mg/ml   | 18 | 0,32 | 0,10 | 0,803        |
|                | 10 mg/ml  | 18 | 0,29 | 0,11 | 0,339        |
|                | 25 mg/ml  | 18 | 0,04 | 0,01 | <b>0,000</b> |
| <b>HMK 72h</b> | Control   | 18 | 0,57 | 0,12 |              |
|                | 0,2 mg/ml | 18 | 0,55 | 0,14 | 0,621        |
|                | 1 mg/ml   | 18 | 0,65 | 0,24 | 0,212        |
|                | 5 mg/ml   | 18 | 0,49 | 0,40 | 0,418        |
|                | 10 mg/ml  | 18 | 0,13 | 0,12 | <b>0,000</b> |
|                | 25 mg/ml  | 18 | 0,11 | 0,03 | <b>0,000</b> |
